# Supplementary material
Source: PubMed Central journal article supplement (PMC10147449)

A

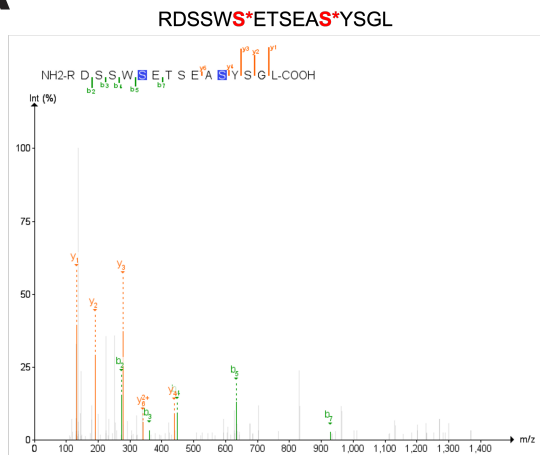

B

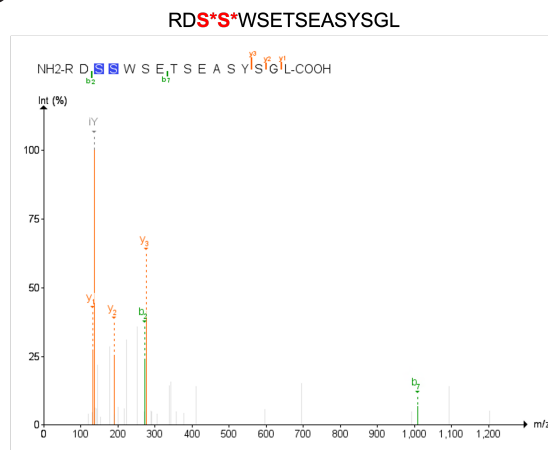

C

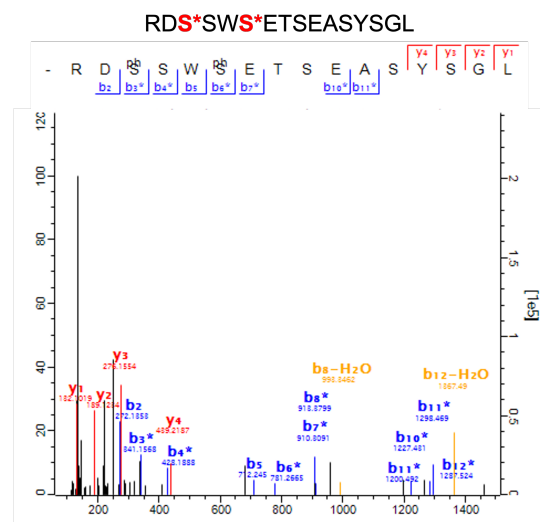

D

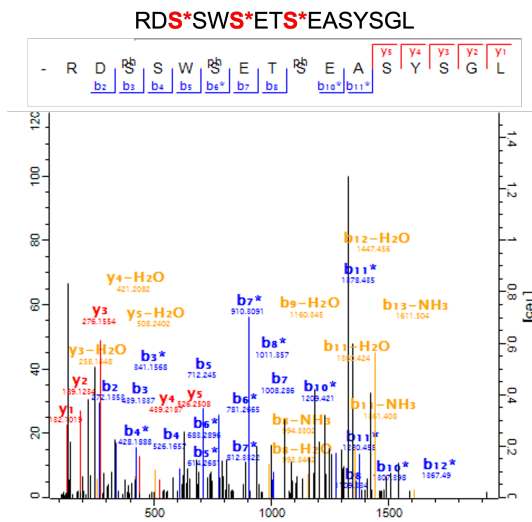

E

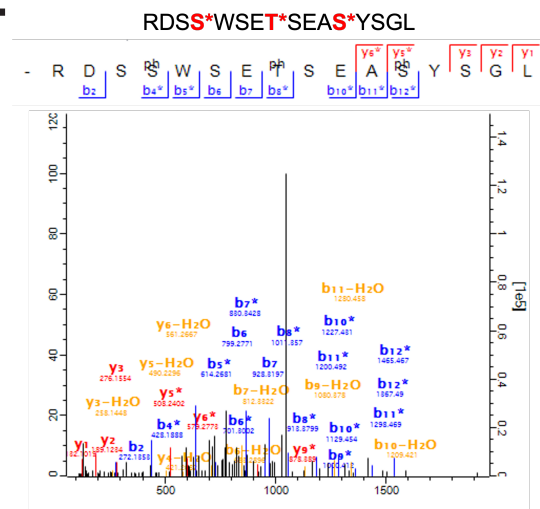

F

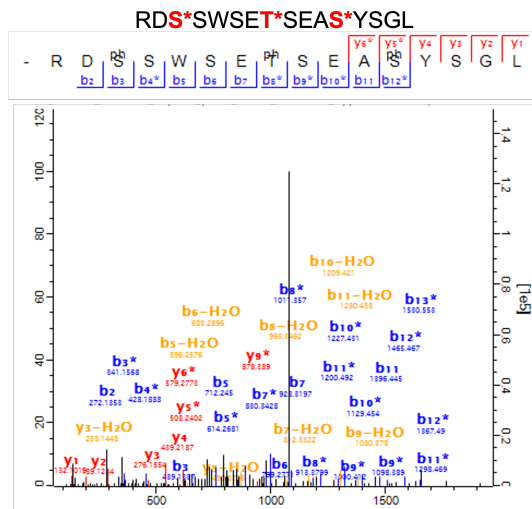

**SUPPLEMENTAL FIGURE 2**

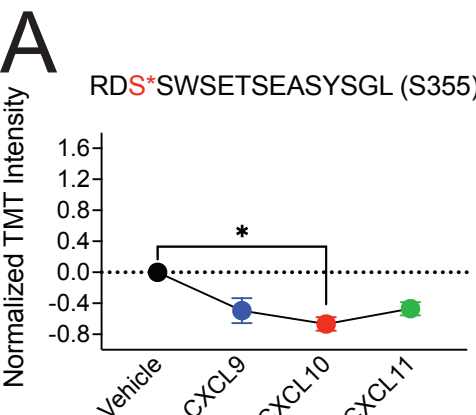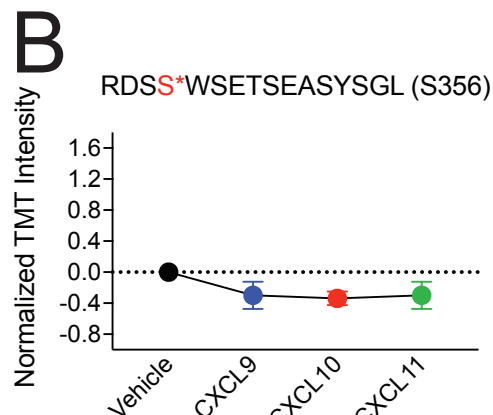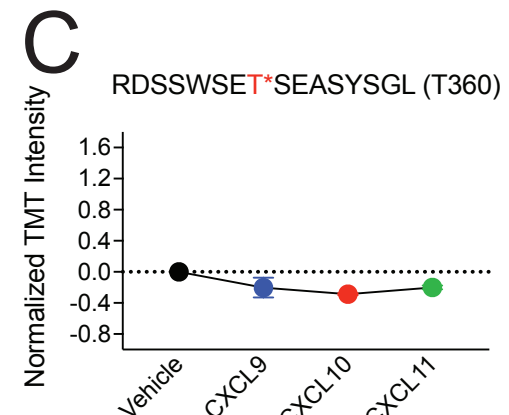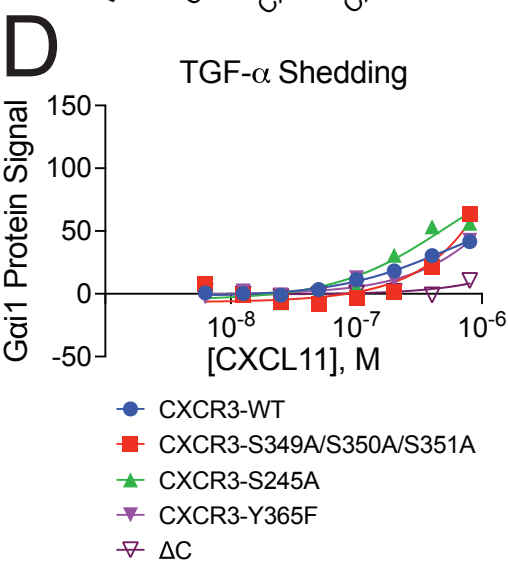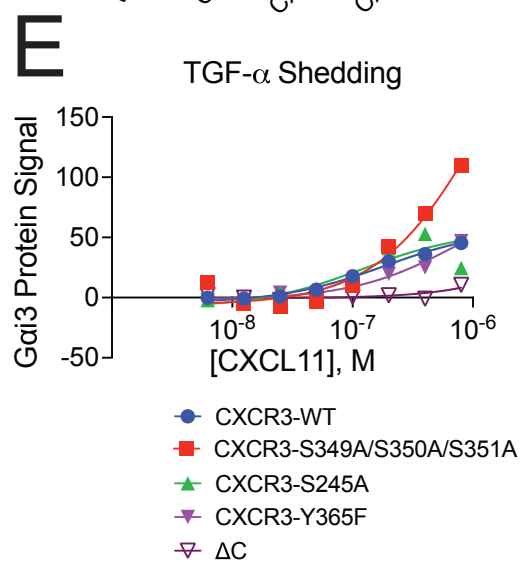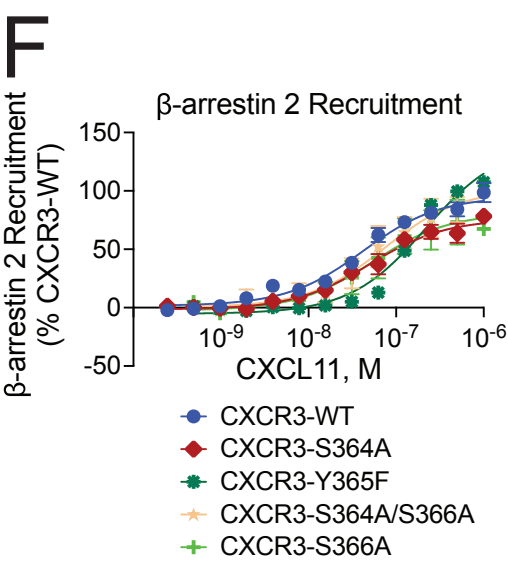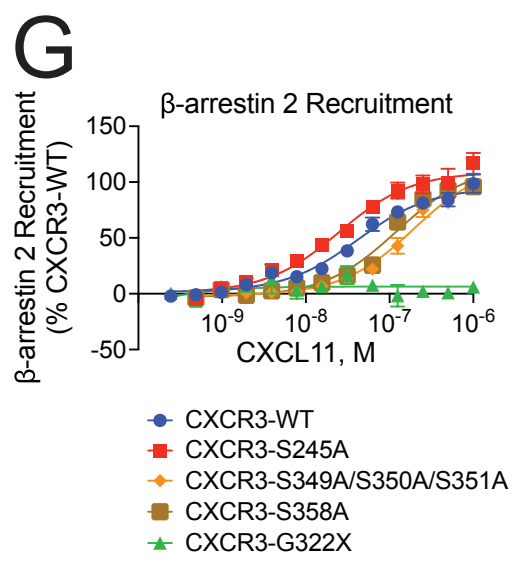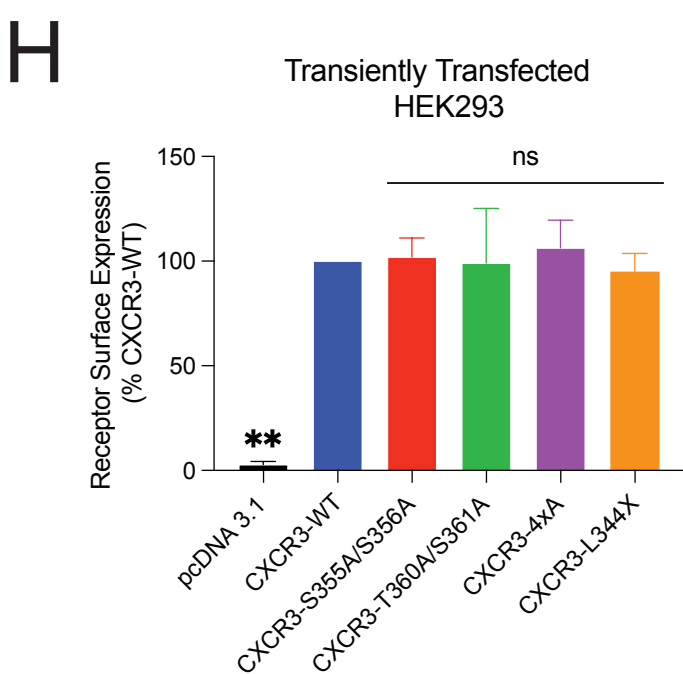

### G Protein Dissociation

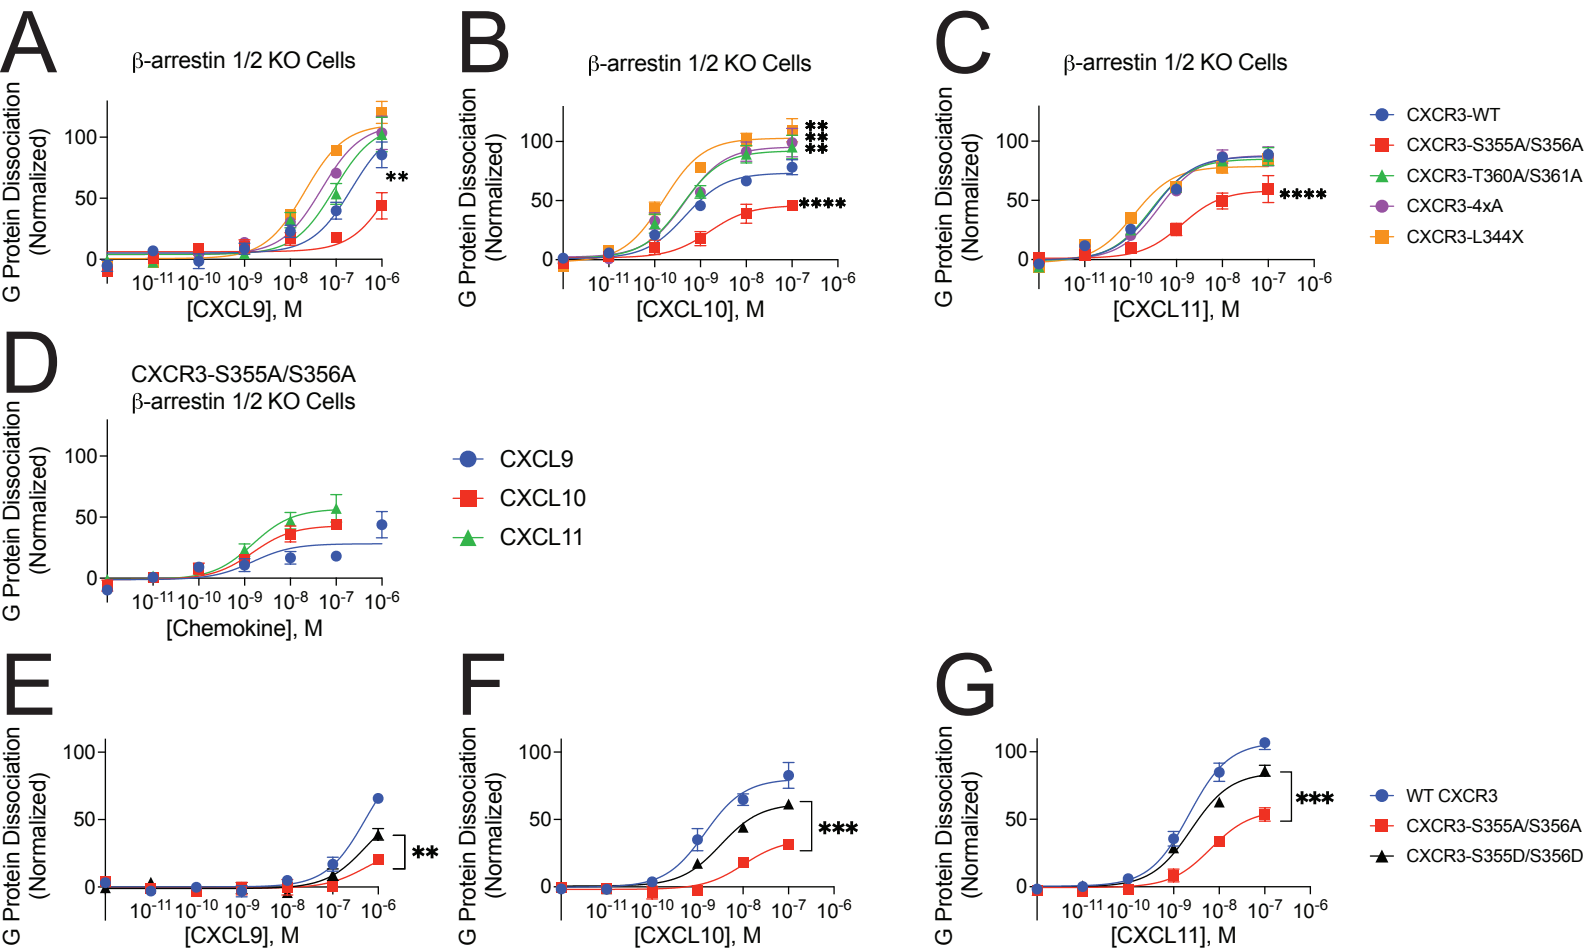

### $\beta$ -arrestin 2 Recruitment

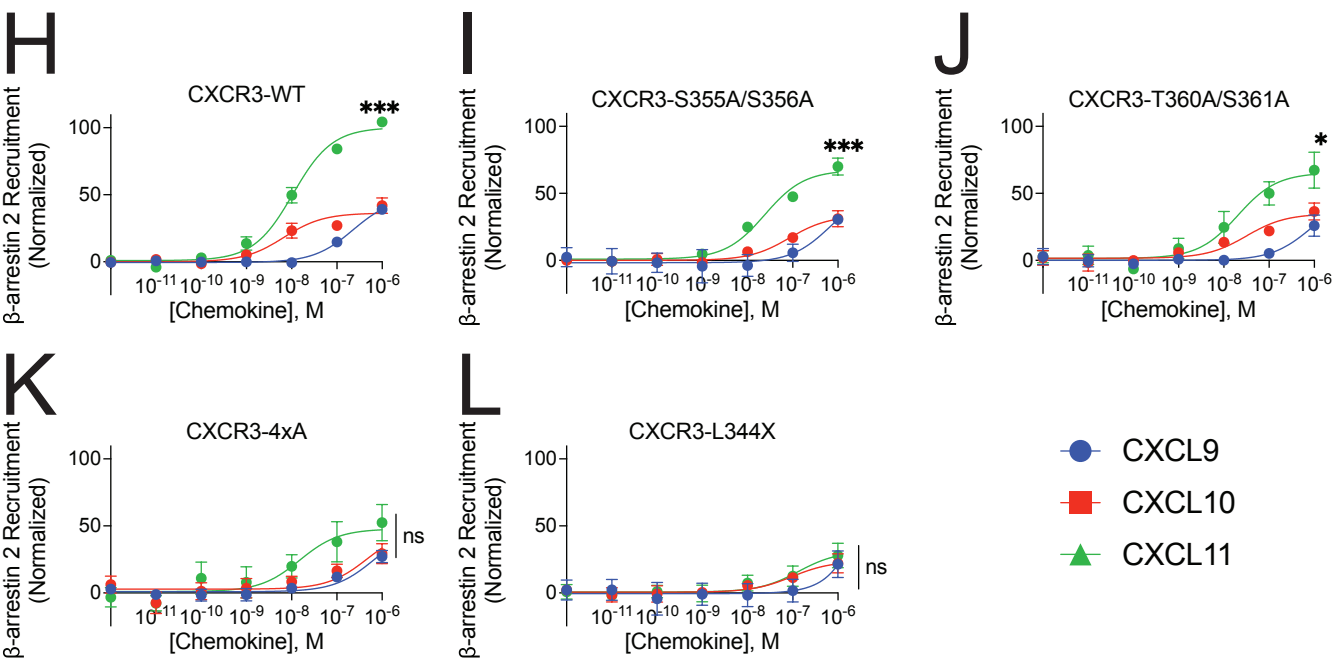

Receptor Internalization

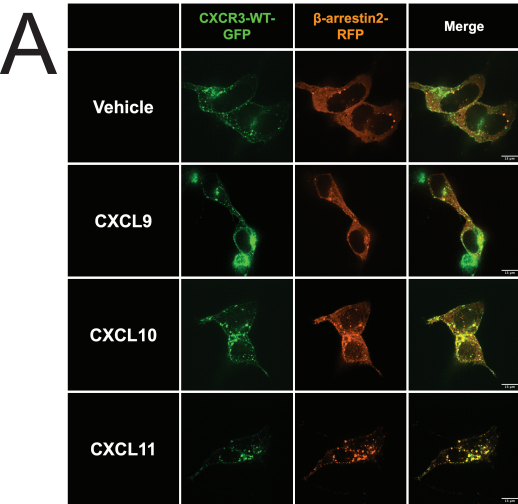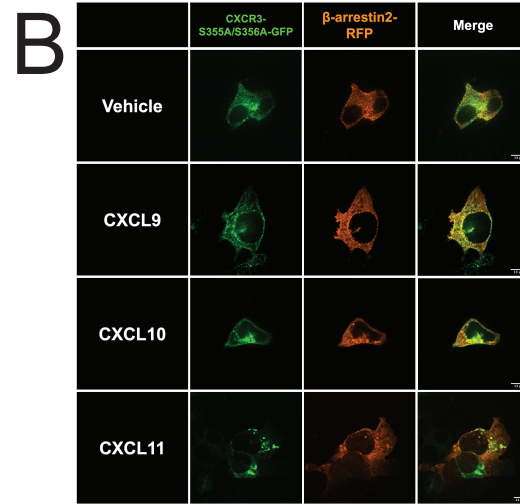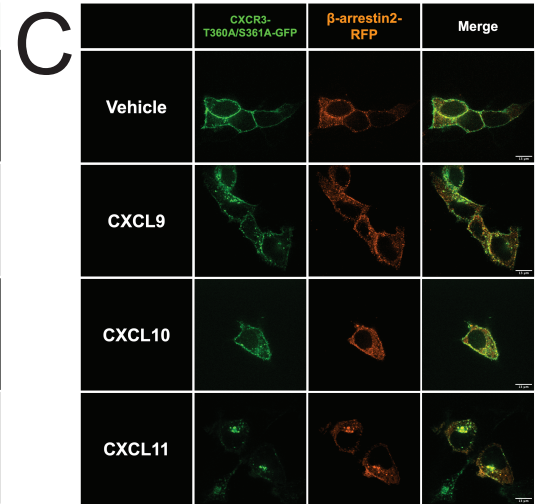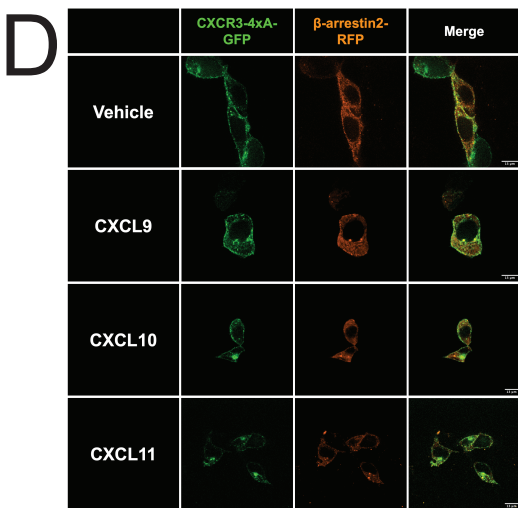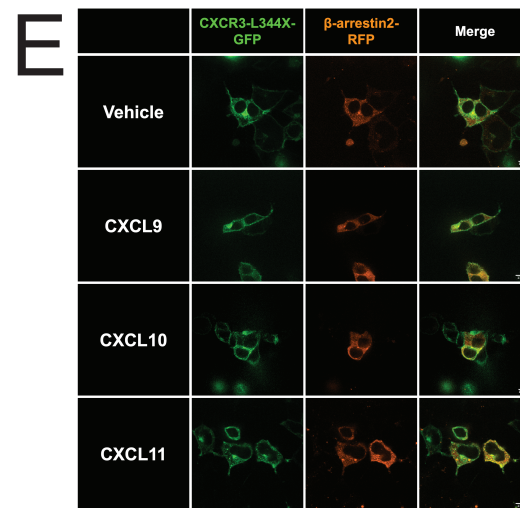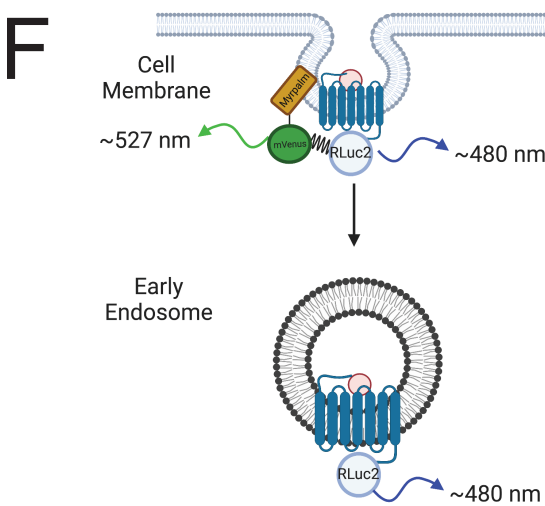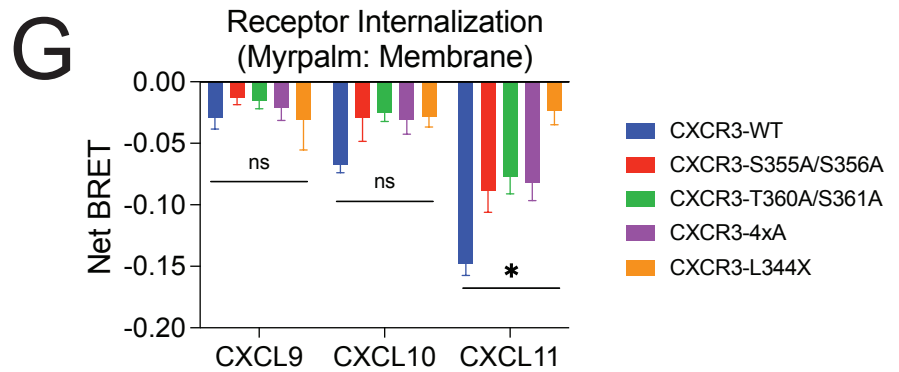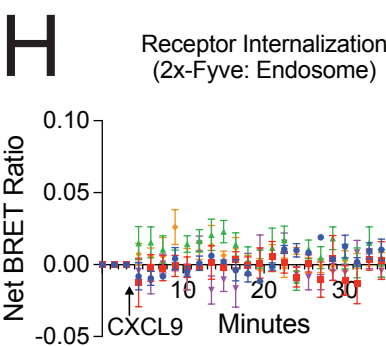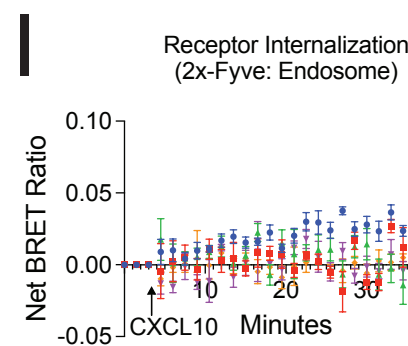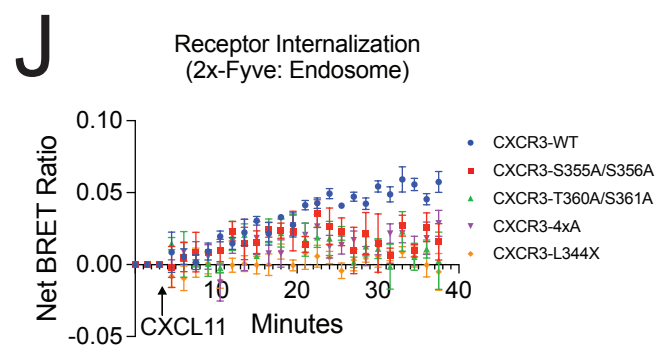

# GRK5 Recruitment

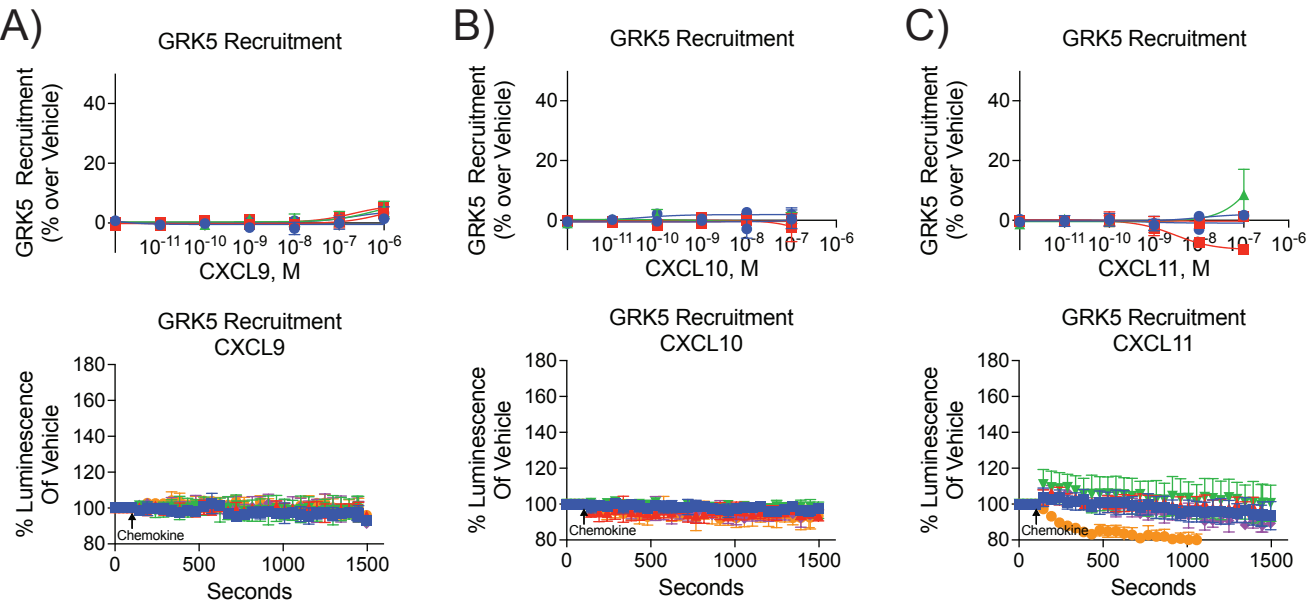

- CXCR3-WT
- CXCR3-S355A/S356A
- ▲ CXCR3-T360A/S361A
- ▼ CXCR3-4xA
- ◆ CXCR3-L344X

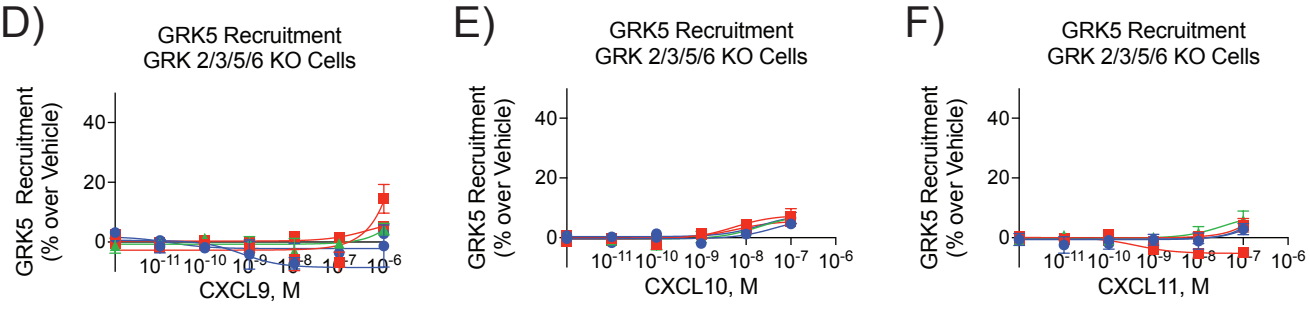

- CXCR3-WT
- CXCR3-S355A/S356A
- ▲ CXCR3-T360A/S361A
- ▼ CXCR3-4xA
- ◆ CXCR3-L344X

# GRK6 Recruitment

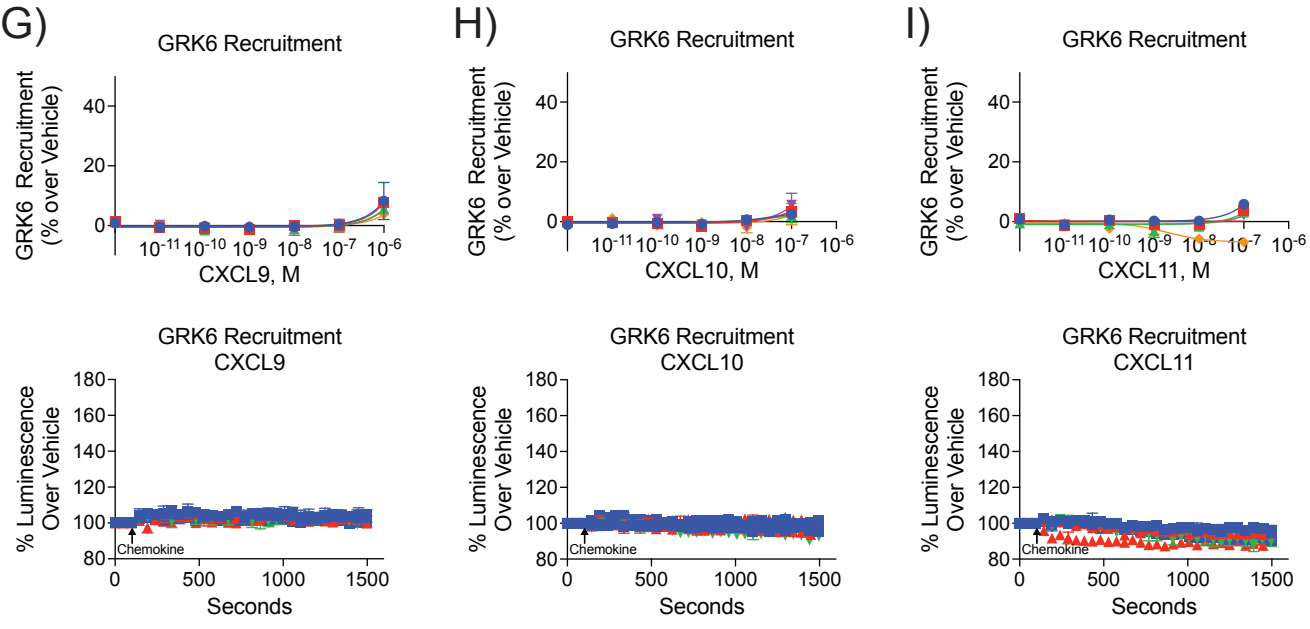

- CXCR3-WT
- CXCR3-S355A/S356A
- ▲ CXCR3-T360A/S361A
- ▼ CXCR3-4xA
- ◆ CXCR3-L344X

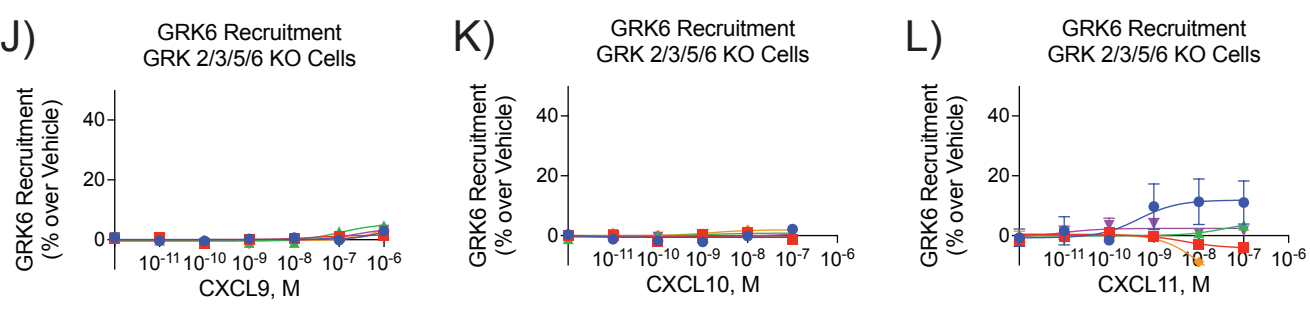

- CXCR3-WT
- CXCR3-S355A/S356A
- ▲ CXCR3-T360A/S361A
- ▼ CXCR3-4xA
- ◆ CXCR3-L344X

# GRK2 Recruitment

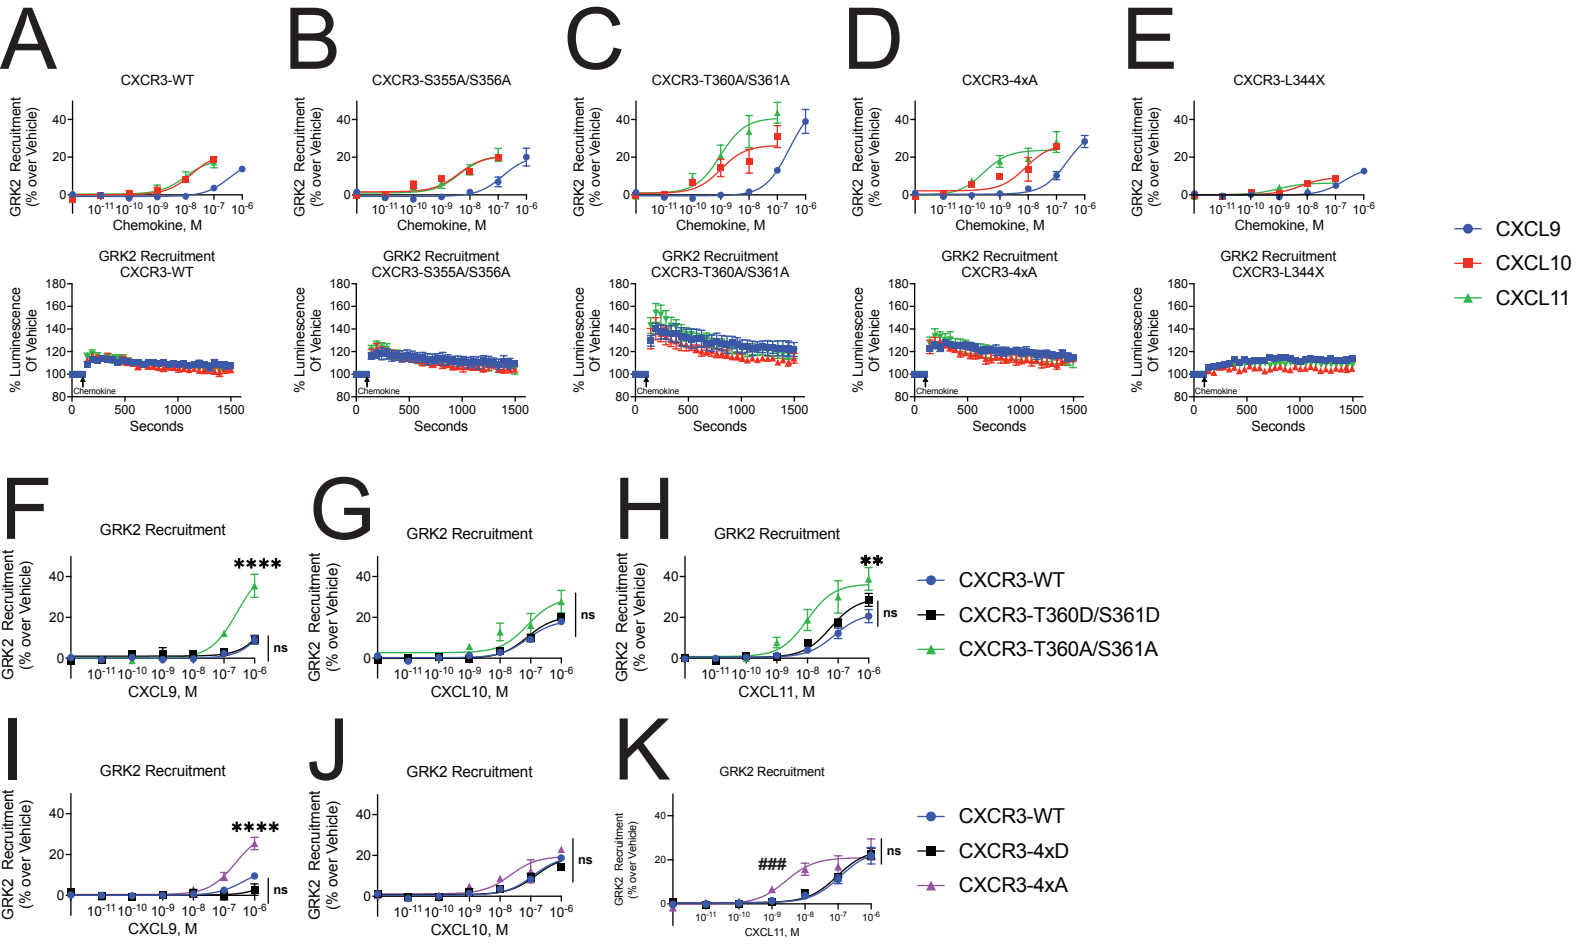

# GRK3 Recruitment

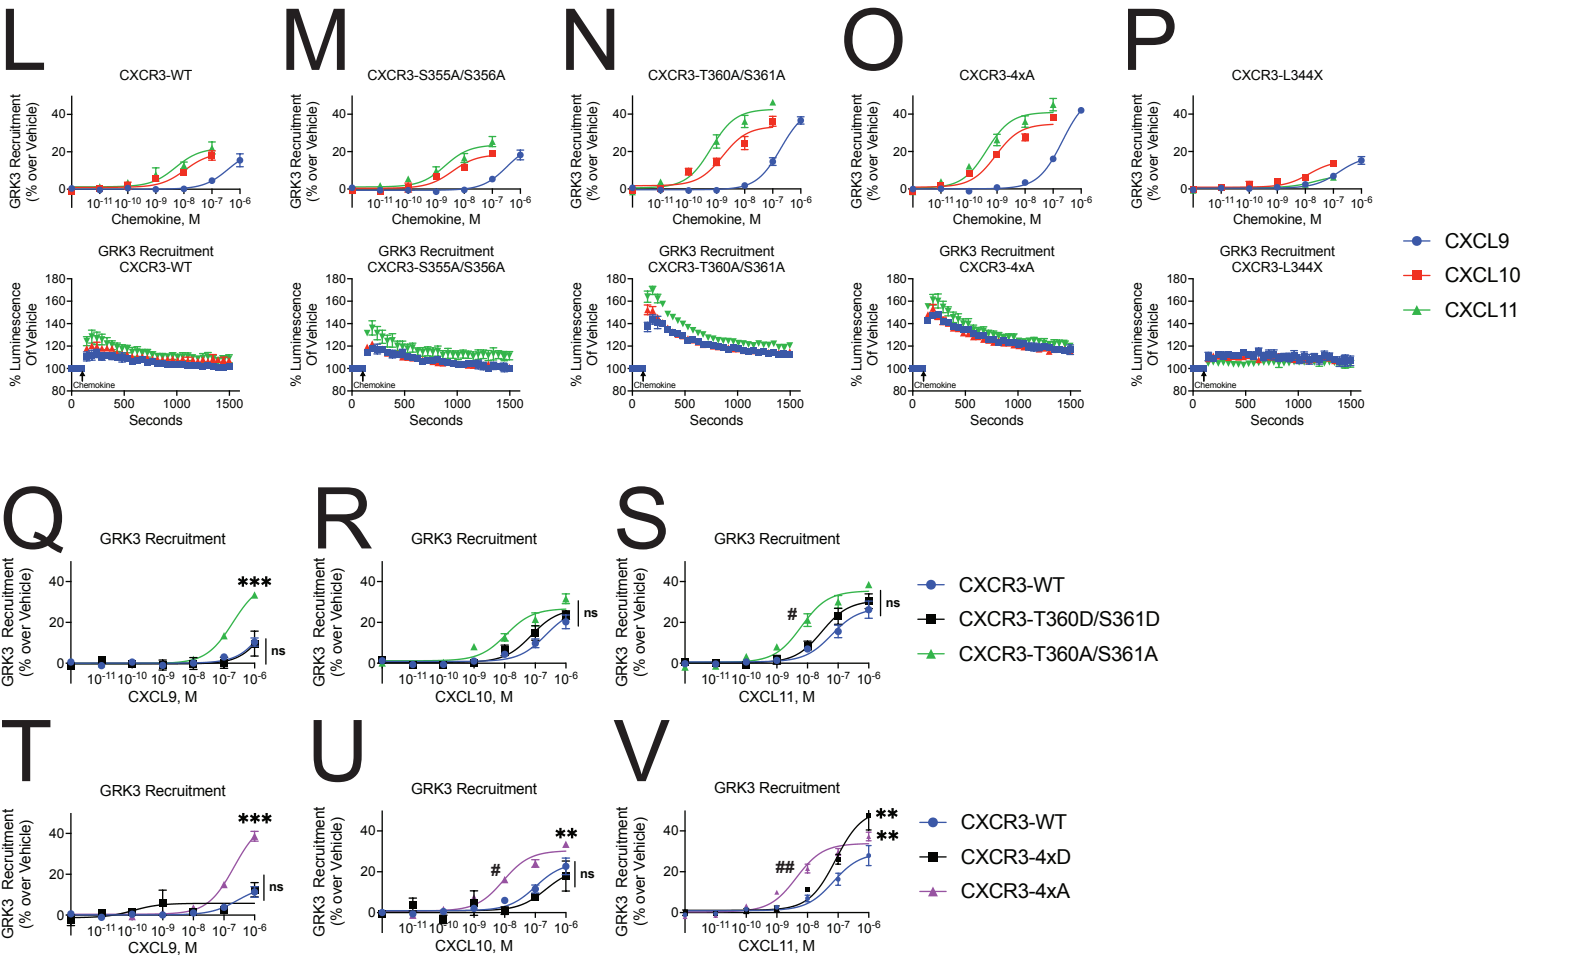

SUPPLEMENTAL FIGURE 7

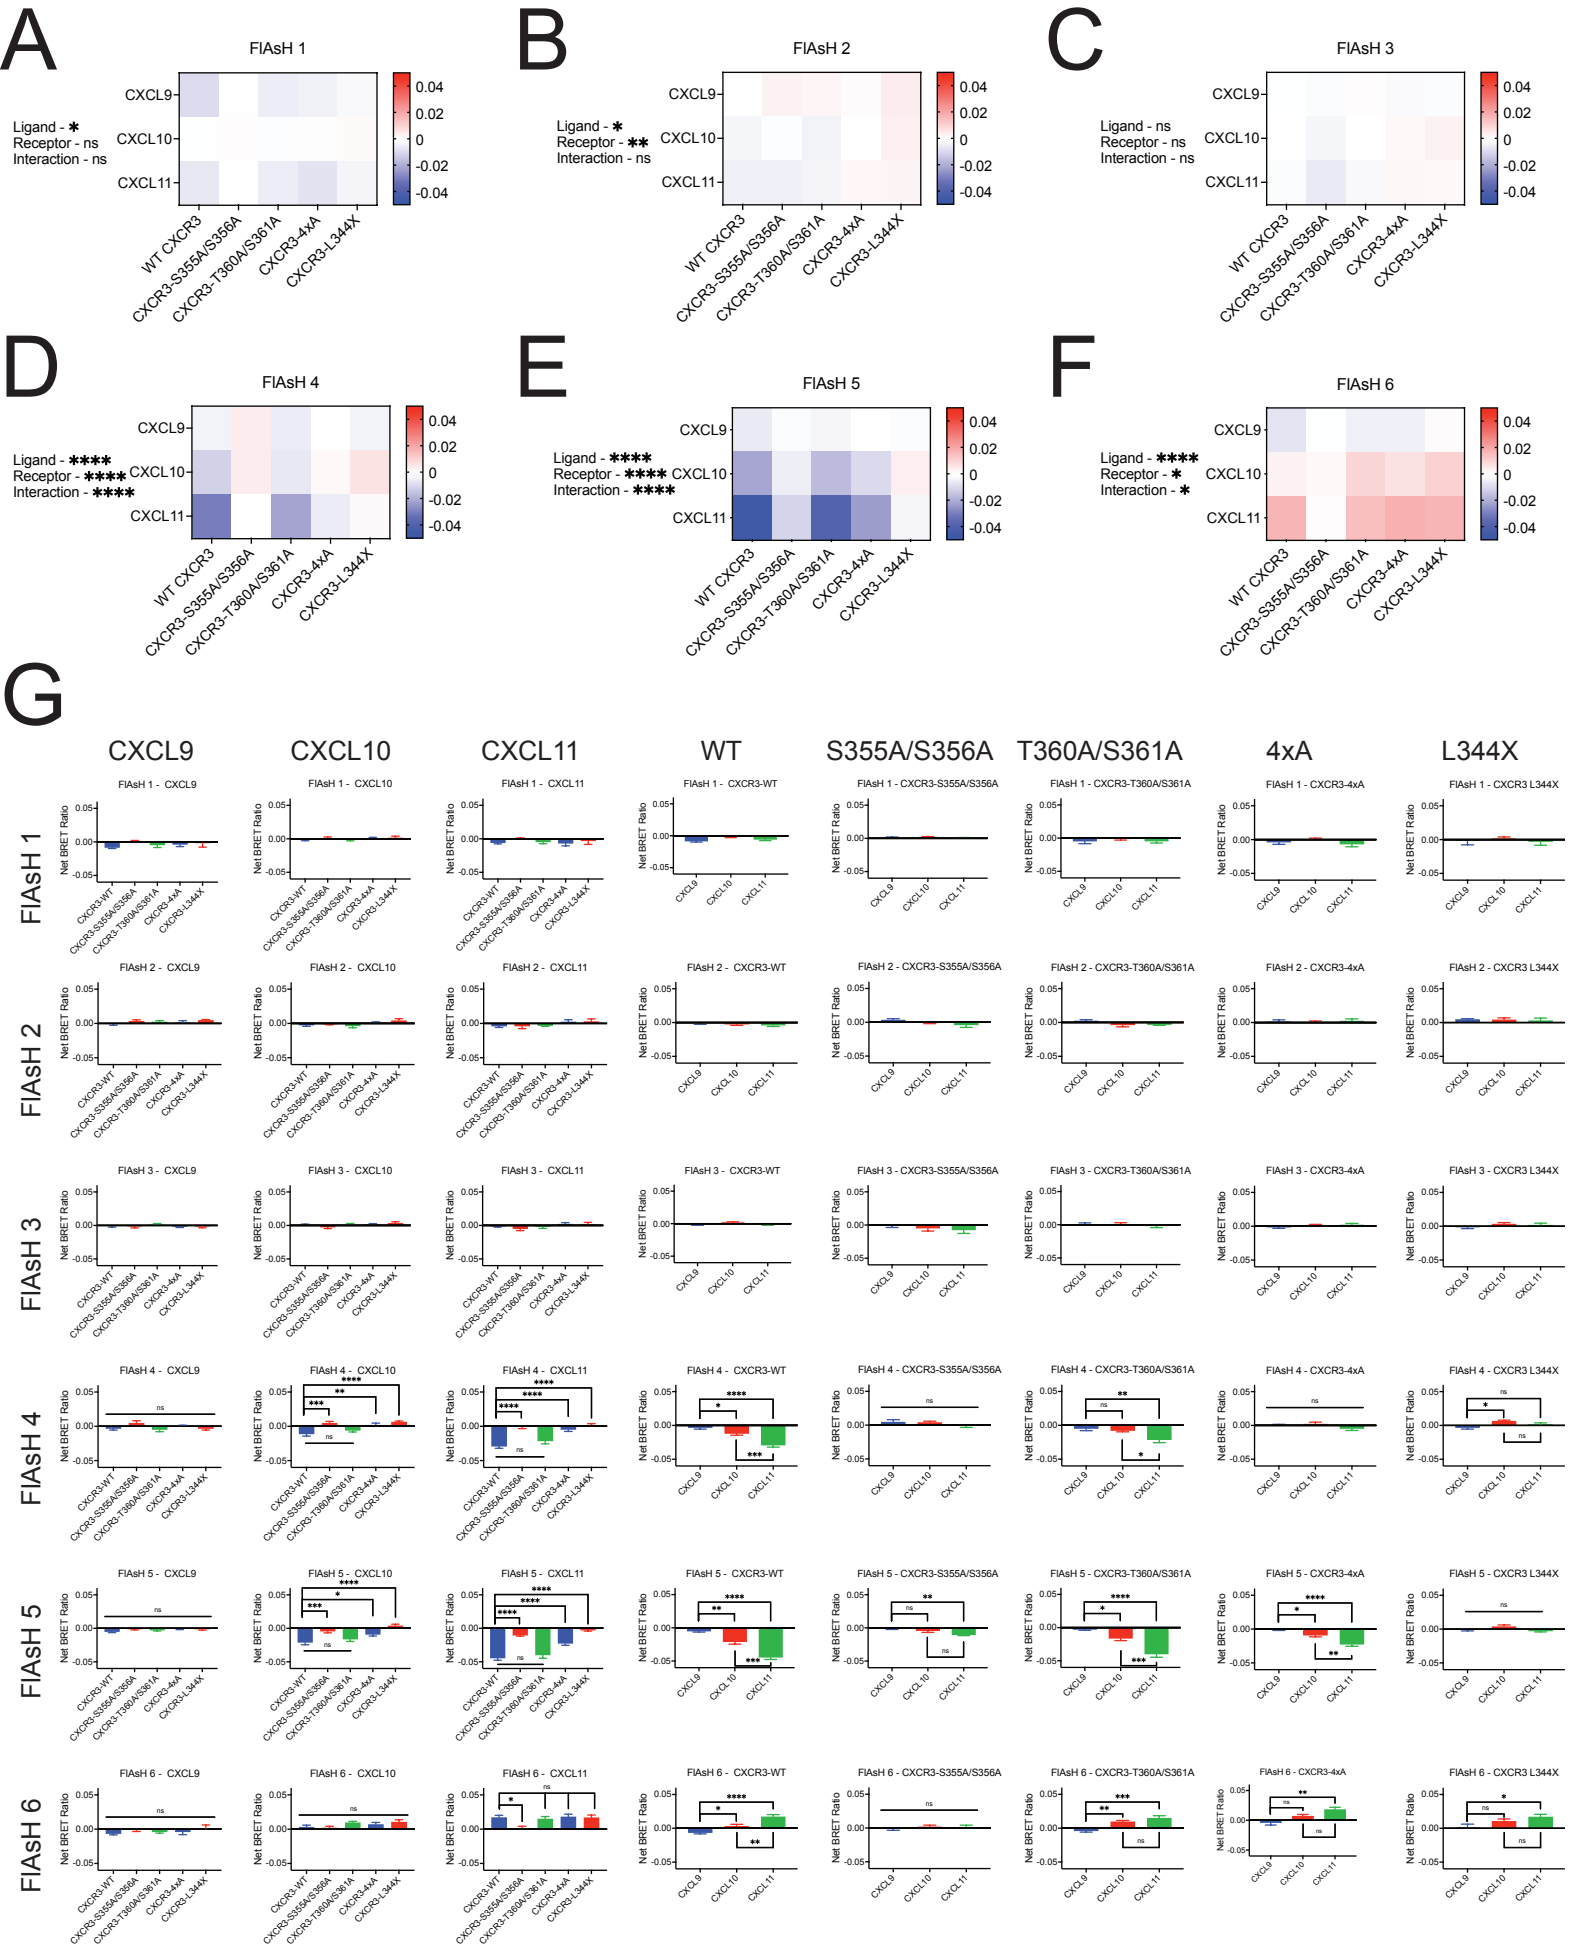

# SUPPLEMENTAL FIGURE 8

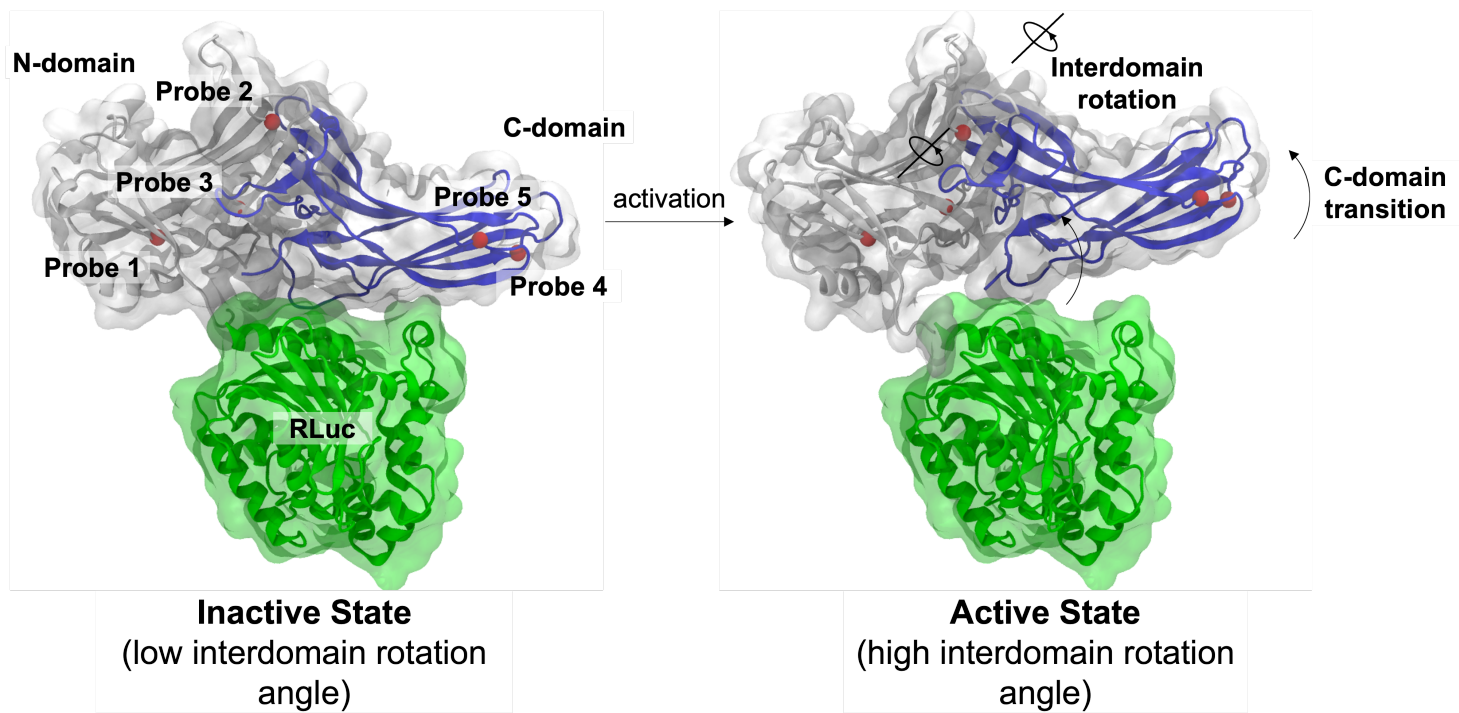



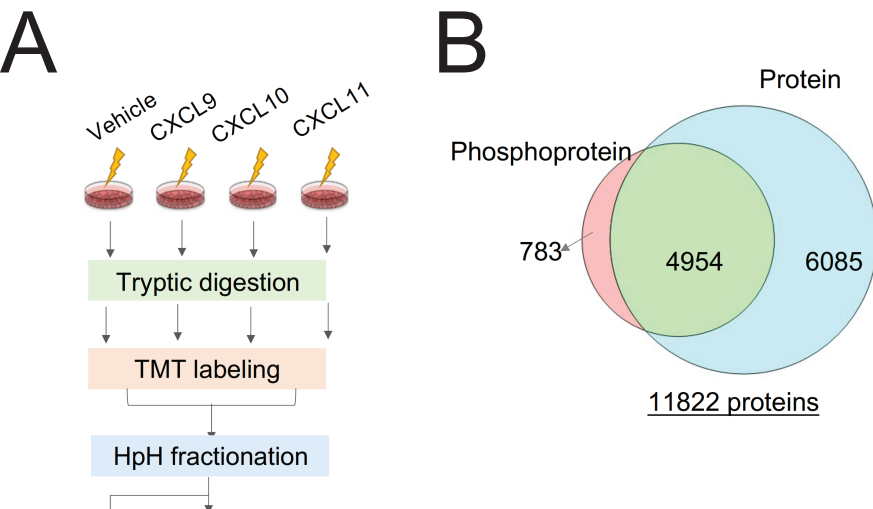

**C**

| Proteome       |        |
|----------------|--------|
| Total Peptides | 159739 |
| Proteins       | 11038  |

  

| Phosphoproteome               |       |
|-------------------------------|-------|
| Total Peptides                | 29992 |
| Phosphopeptides               | 26556 |
| Phosphorylation Sites         | 22620 |
| Phosphoproteins               | 5736  |
| Class 1 Phosphorylation Sites | 16448 |
| S                             | 18388 |
| T                             | 4112  |
| Y                             | 120   |

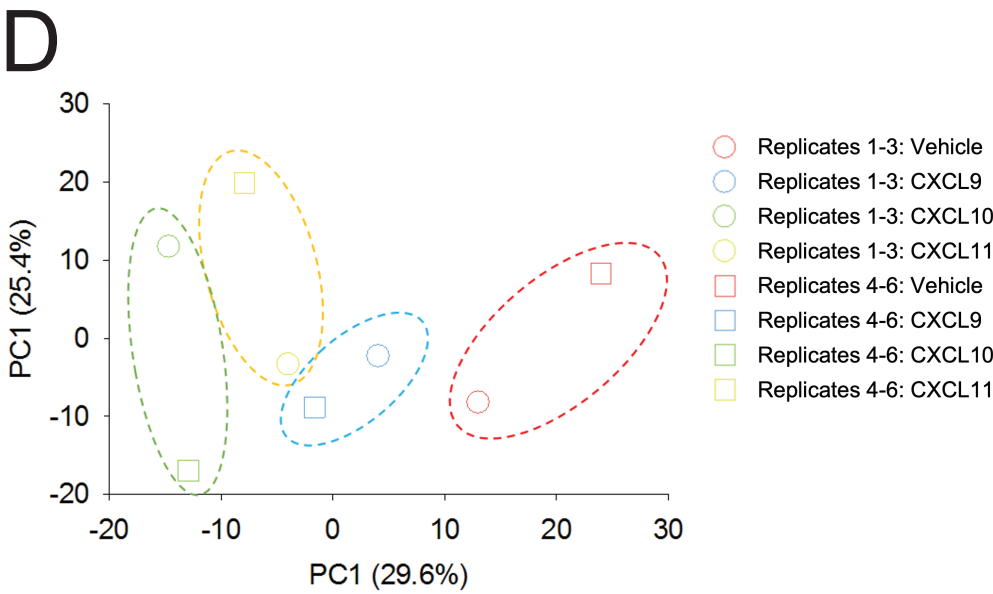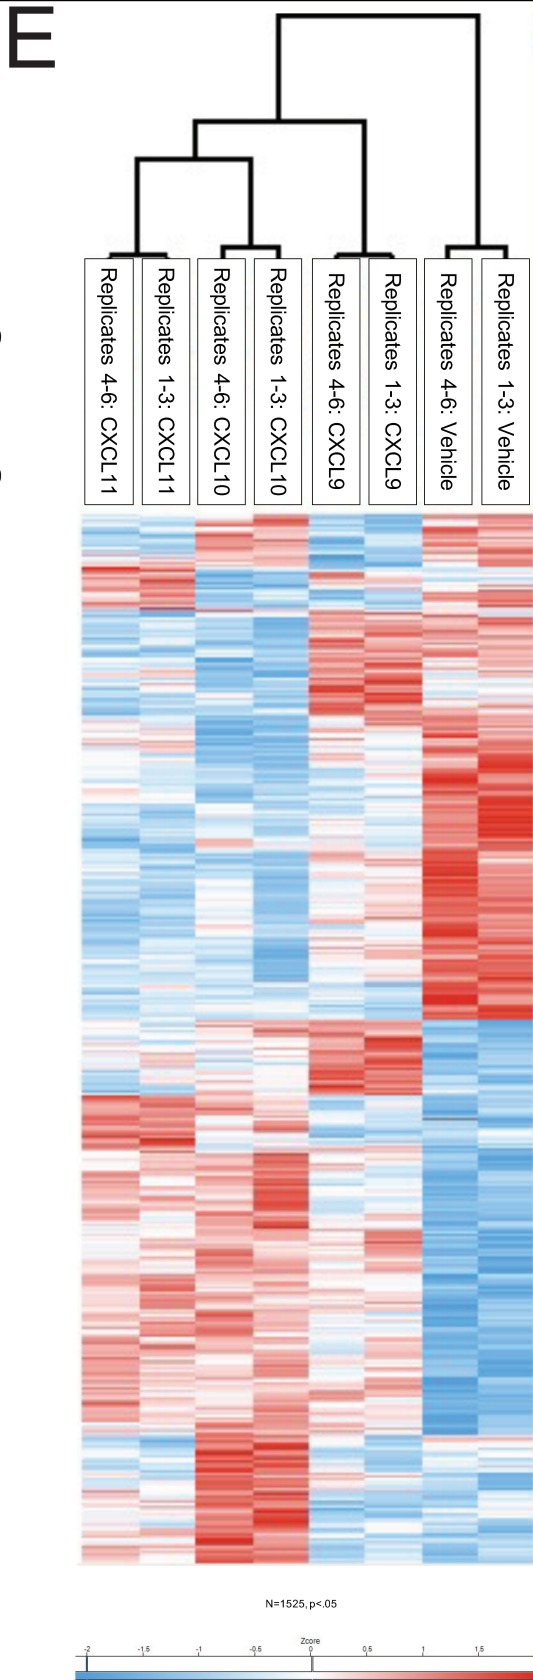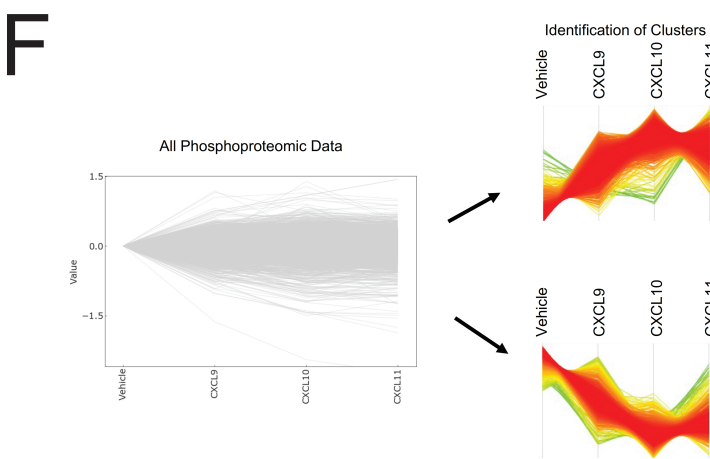

**G**

| Cellular Compartment                    | Percentage | Biological Process                                                   | Percentage | Molecular Function                              | Percentage |
|-----------------------------------------|------------|----------------------------------------------------------------------|------------|-------------------------------------------------|------------|
| Cytoplasm                               | 19.4%      | Transcription, DNA-Templated                                         | 20.4%      | Protein Binding                                 | 40.6%      |
| Nucleus                                 | 18.9%      | Negative Regulation Of Transcription From RNA Polymerase II Promoter | 9.2%       | Poly(A) RNA Binding                             | 10.8%      |
| Nucleoplasm                             | 14.5%      | Negative Regulation Of Transcription, DNA-Templated                  | 7.8%       | ATP Binding                                     | 8.7%       |
| Cytosol                                 | 12.8%      | Protein Phosphorylation                                              | 7.0%       | DNA Binding                                     | 8.2%       |
| Membrane                                | 7.9%       | Cell-Cell Adhesion                                                   | 6.9%       | RNA Binding                                     | 4.2%       |
| Nucleolus                               | 4.1%       | Cell Division                                                        | 6.3%       | Chromatin Binding                               | 3.5%       |
| Perinuclear Region Of Cytoplasm         | 2.6%       | Viral Process                                                        | 6.2%       | Cadherin Binding Involved In Cell-Cell Adhesion | 3.4%       |
| Centrosome                              | 2.5%       | mRNA Splicing, Via Spliceosome                                       | 5.1%       | Protein Serine/Threonine Kinase Activity        | 3.1%       |
| Cell-Cell Adherens Junction             | 2.5%       | Mitotic Nuclear Division                                             | 4.4%       | Protein Kinase Binding                          | 2.8%       |
| Microtubule                             | 2.4%       | Cellular Response To DNA Damage Stimulus                             | 4.0%       | Nucleotide Binding                              | 2.7%       |
| Cytoskeleton                            | 2.2%       | mRNA Processing                                                      | 3.8%       | Protein Kinase Activity                         | 2.7%       |
| Protein Complex                         | 2.0%       | RNA Splicing                                                         | 3.5%       | Actin Binding                                   | 2.0%       |
| Focal Adhesion                          | 2.0%       | Peptidyl-Serine Phosphorylation                                      | 3.1%       | Microtubule Binding                             | 1.8%       |
| Nuclear Speck                           | 1.8%       | Protein Sumoylation                                                  | 3.0%       | Kinase Activity                                 | 1.8%       |
| Midbody                                 | 1.1%       | Covalent Chromatin Modification                                      | 2.8%       | SH3 Domain Binding                              | 1.2%       |
| Intracellular Ribonucleoprotein Complex | 1.1%       | mRNA Export From Nucleus                                             | 2.7%       | Structural Constituent Of Cytoskeleton          | 1.1%       |
| Lamellipodium                           | 1.0%       | Microtubule Cytoskeleton Organization                                | 2.4%       | Helicase Activity                               | 1.0%       |
| Spindle                                 | 0.9%       | Mitotic Cytokinesis                                                  | 1.4%       | ATP-Dependent Dna Helicase Activity             | 0.6%       |

**SUPPLEMENTAL FIGURE 10**

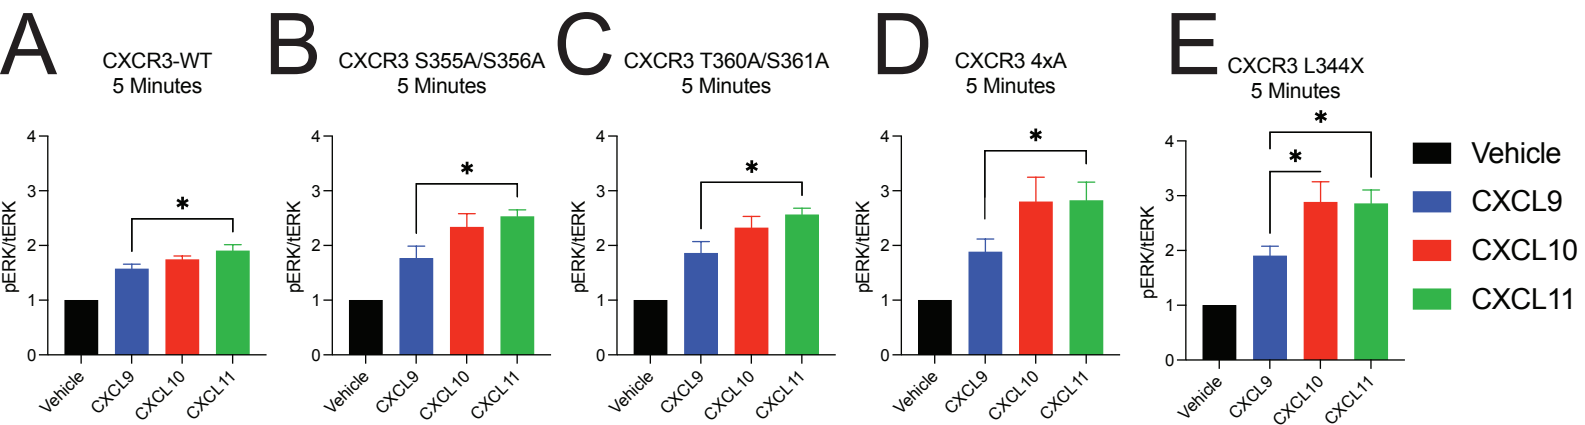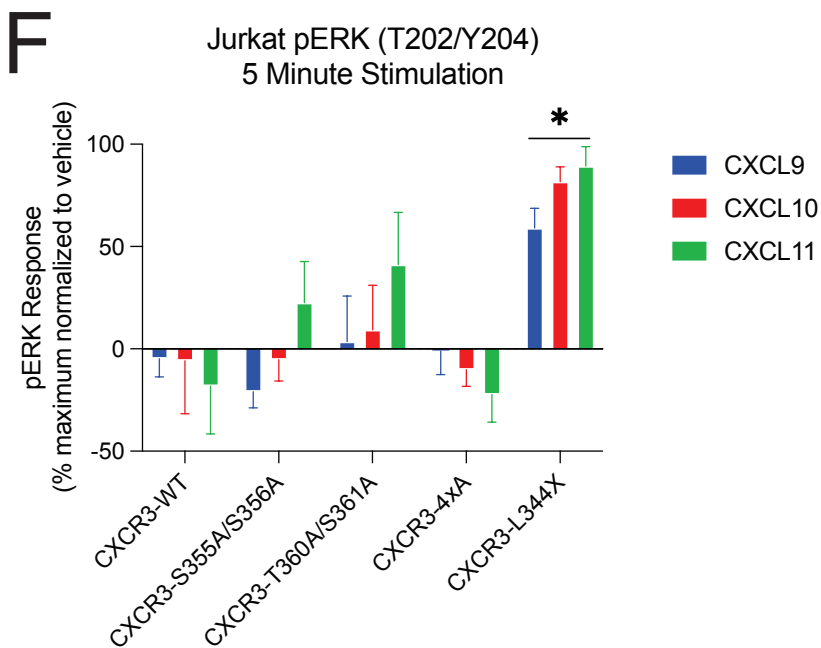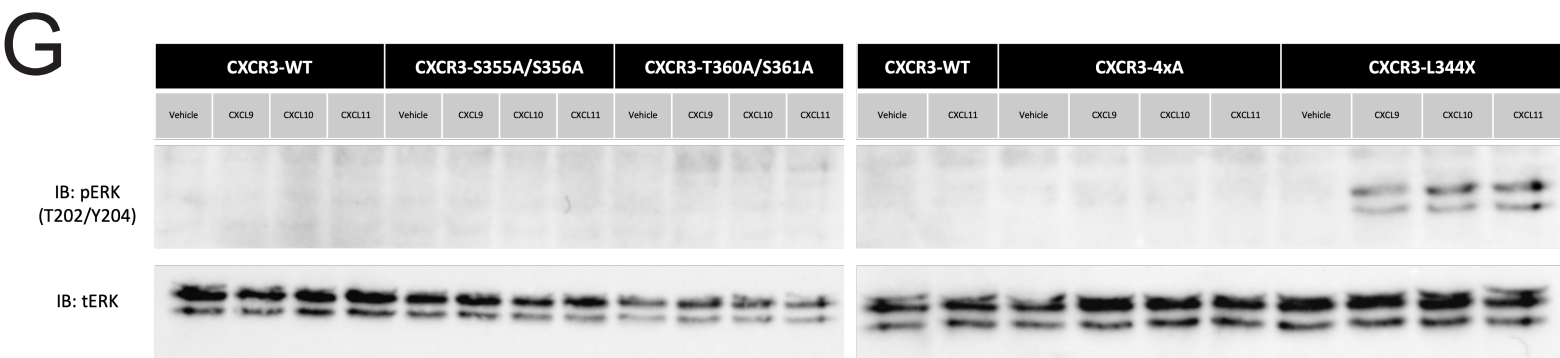

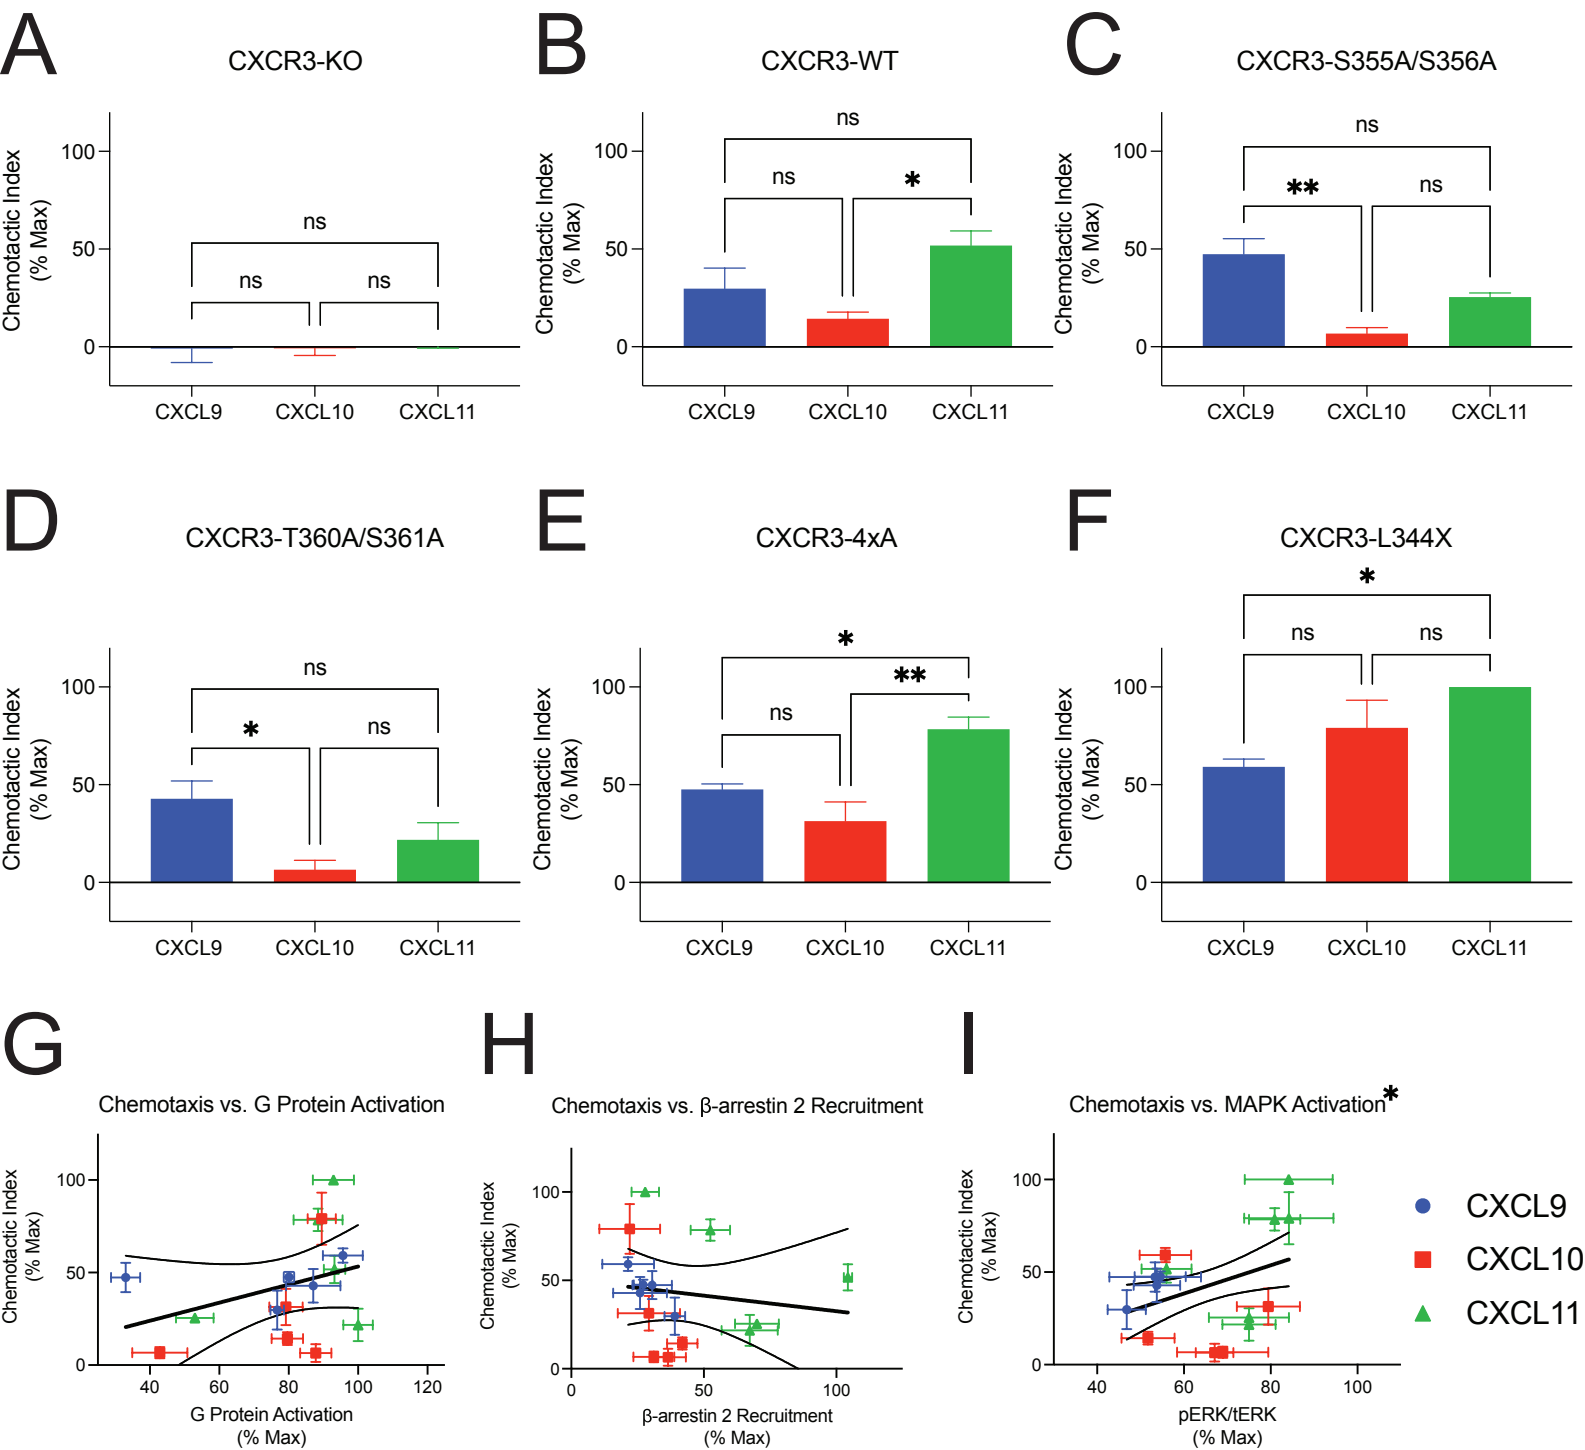

Supplement: NIHMS1893928-supplement-Supplementary_Figures.pdf [file NIHMS1893928-supplement-Supplementary_Figures.pdf]
